# Supplementary material
Source: Elsevier journal article supplement (https://www.sciencedirect.com/science/article/pii/S0021755720301947)
Supplement: mmc1 [file S0021755720301947:mmc1.docx]

**APPENDICES**
